# Supplementary material for: Neuroprotection of Rodent and Human Retinal Ganglion Cells In Vitro/Ex Vivo by the Hybrid Small Molecule SA-2
Source: MDPI journal article supplement (doi:10.3390/cells11233741), 2022-11-23
Supplement: s1 [file s1]

**A.**

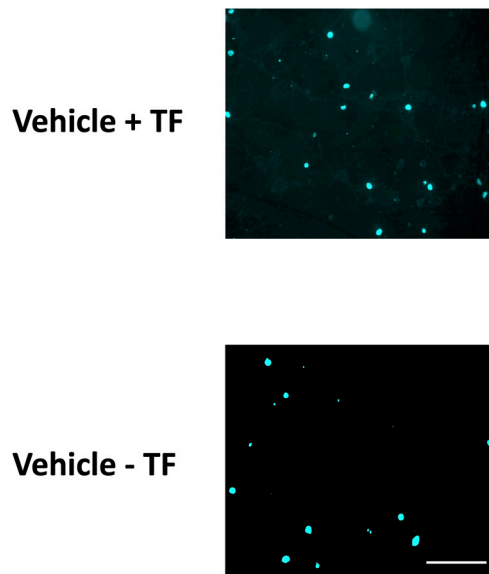

**B.**

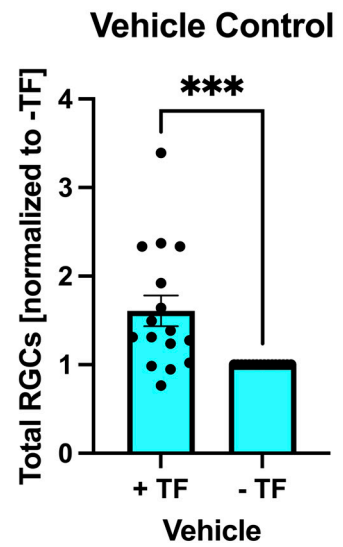

Figure S1: Vehicle RGC counts in the presence and absence of neurotrophic factors. **A.** Representative images of RGCs treated with vehicle in the presence or absence of neurotrophic factors for 48 h. **B.** Graph bars represent total (Hoechst 33342) RGC counts, using the Mann-Whitney test. Data represent the mean  $\pm$  standard error of the mean (SEM) (n = 3 biological replicates). \*\*\*  $p < 0.001$ . Scale bar represents 200  $\mu\text{m}$ .

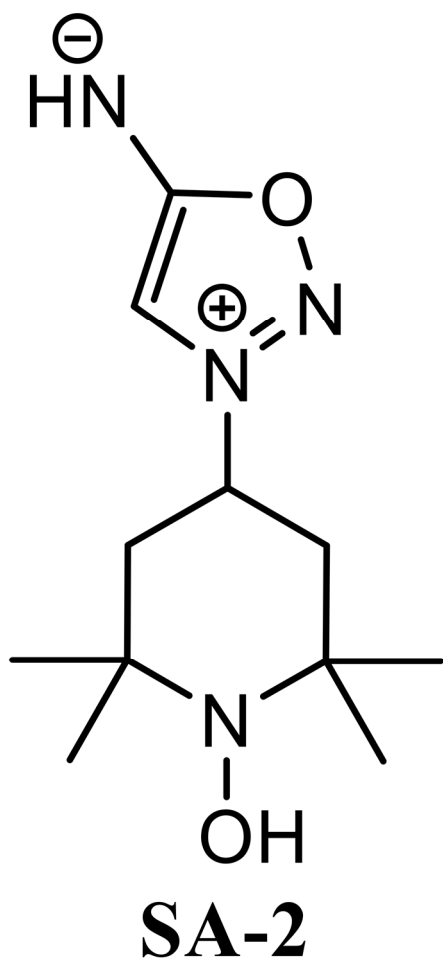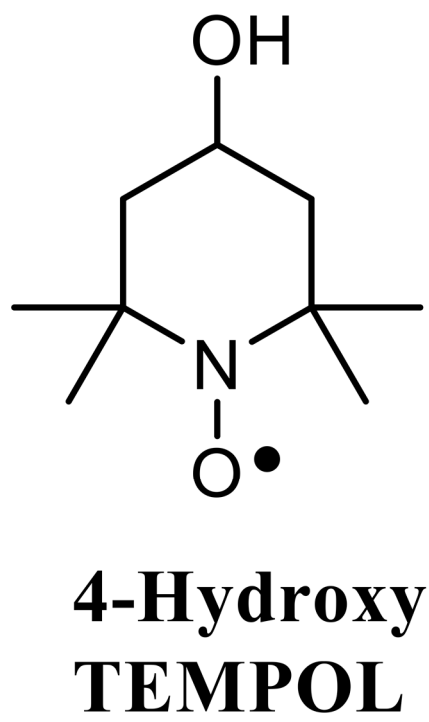

Figure S2: The structure of SA-2 and 4-hydroxy TEMPOL.
